# Supplementary material
Source: Springer Nature journal article supplement (https://www.springermedizin.de/resource/supplementary/12916_2013_868_MOESM3_ESM.pdf/9598518)
Supplement: MOESM3 [file 9598518]

**Naive**

**Relapser**

**Nonresponder**

**F0F1**

**Individual  
decision**

**Individual  
decision/  
triple therapy**

**Defer**

**F2F3**

**Triple therapy**

**Triple therapy**

**Individual decision  
according to disease  
progression**

**F4**

**Triple therapy**

**Triple therapy**

**Discuss  
therapy on a  
case by case**
